# Supplementary material for: Comprehensive bioinformatics analysis reveals potential lncRNA biomarkers for overall survival in patients with hepatocellular carcinoma: an on-line individual risk calculator based on TCGA cohort
Source: Springer Nature journal article supplement (doi:10.1186/s12935-019-0890-2), 2019-07-04

# Volcano

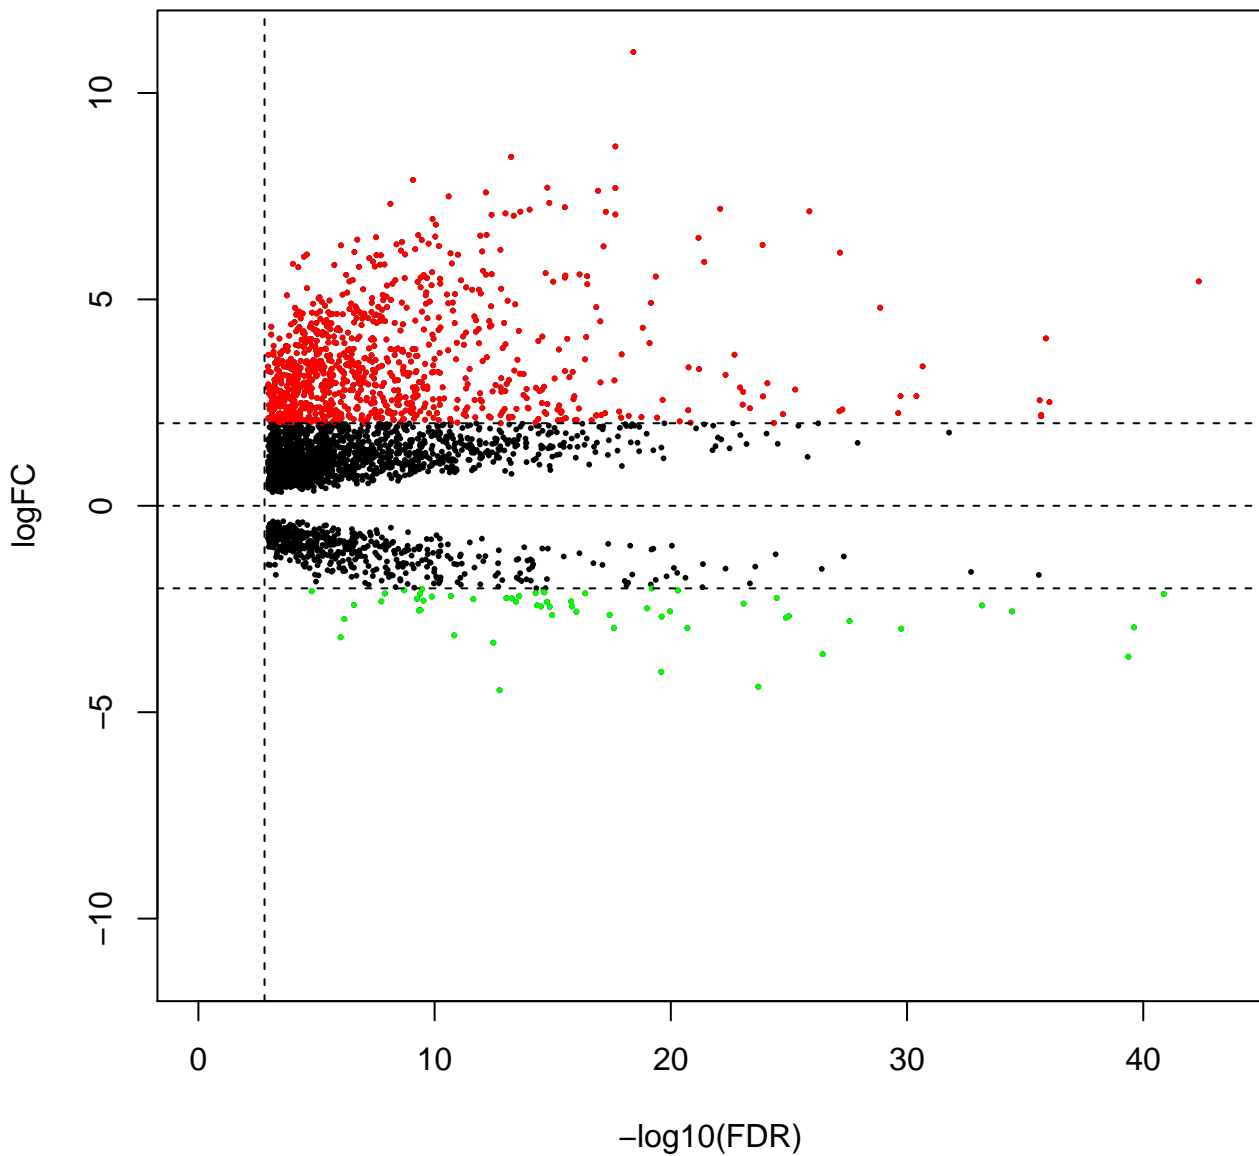

Supplement: MOESM4 [file 16882724]
